# Supplementary material for: Facile preparation of a hydrophilic Eu-based ratiometric fluorescent nanosensor for Cu2+ ion detection and imaging in living cells
Source: Royal Society of Chemistry journal article supplement (doi:10.1039/d4ay01984a), 2024-12-20
Supplement: d4ay01984a1.pdf [file d4ay01984a1.pdf]

## Support Information

for

### Facile preparation of a hydrophilic Eu-based ratiometric fluorescence nanosensor for $\text{Cu}^{2+}$ ion detection and living cells imaging

Moru Zhang, Chunyun Deng, Jing Chen, Shucai Liang\*

Key Laboratory of Combinatorial Biosynthesis and Drug Discovery (Ministry of Education), and School of  
Pharmaceutical Sciences, Wuhan University, Wuhan 430072, China

\*Corresponding authors (chirolab@whu.edu.cn, Shucai Liang)

Fig. S1 H NMR spectrum of PAAC-Eu in  $\text{DMSO-d}_6/\text{D}_2\text{O}/\text{HCl}$

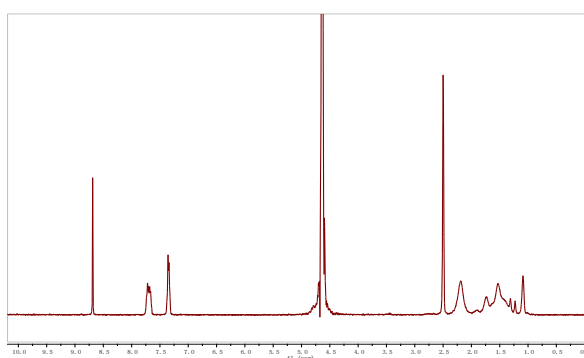

Fig. S2 (a) XRD analysis of PAAC-Eu, PAA,  $\text{EuCl}_3 \cdot 6\text{H}_2\text{O}$  and CCAH, respectively. (b) TEM images of PAAC-Eu.

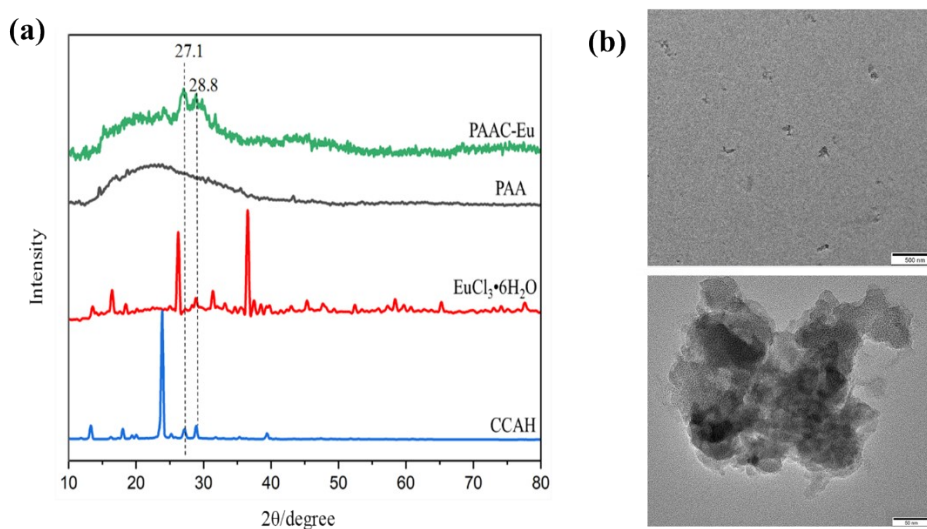

Fig. S3 TG analysis of PAAC-Eu.

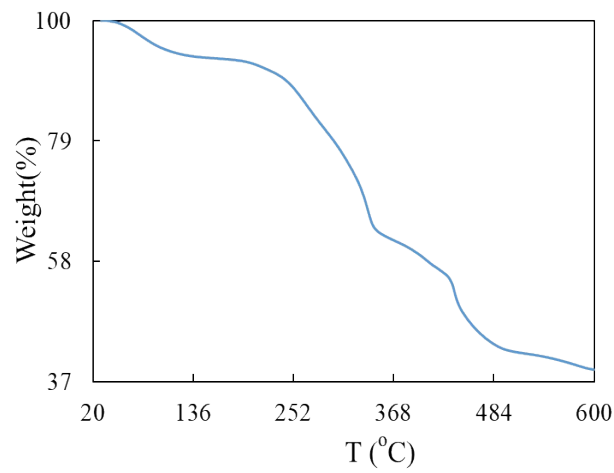

Fig. S4 Fluorescence spectra of PAAC-Eu (---) and CCAH (—) in HEPES buffer solution (pH 7.4) under the excitation wavelength of 350 nm.

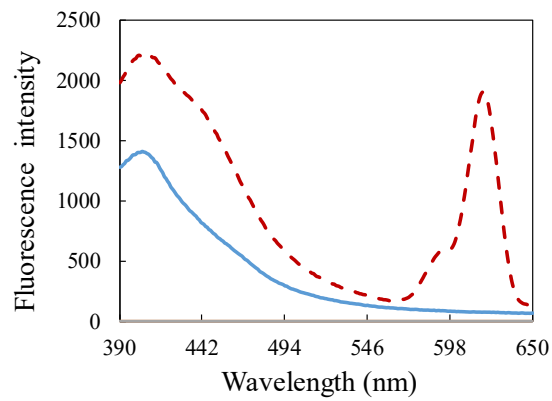

Fig. S5 The effects of pH values on PAAC-Eu luminescence at 406 nm and 618 nm, respectively. ( $\lambda_{ex}=350$  nm)

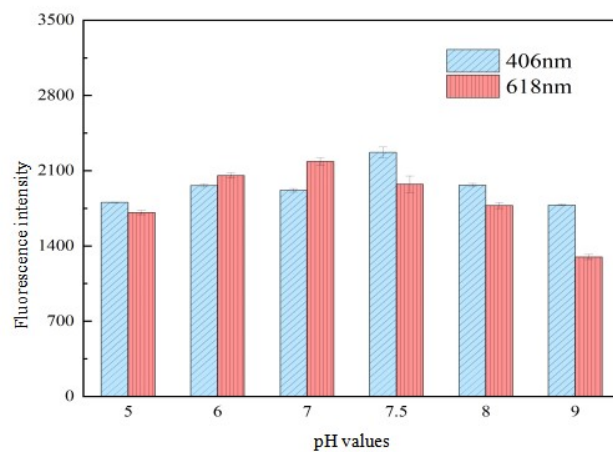

Fig. S6 The fluorescence intensities ratios of PAAC-Eu at 406 nm and 618 nm in pH 7.4 of aqueous solution upon continuous irradiating with a UV lamp. ( $\lambda_{\text{ex}}=350$  nm)

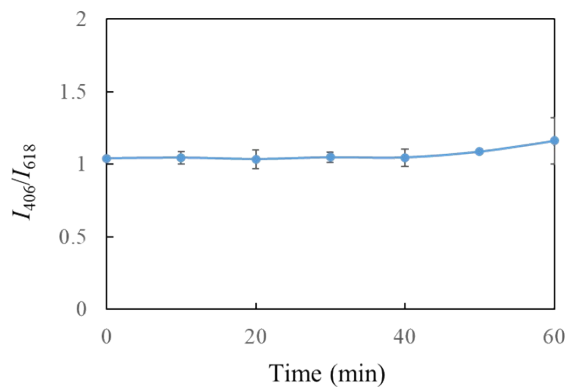

Fig. S7 The Stern-Volmer plot of PAAC-Eu in different concentrations of  $\text{Cu}^{2+}$  ion aqueous solution.

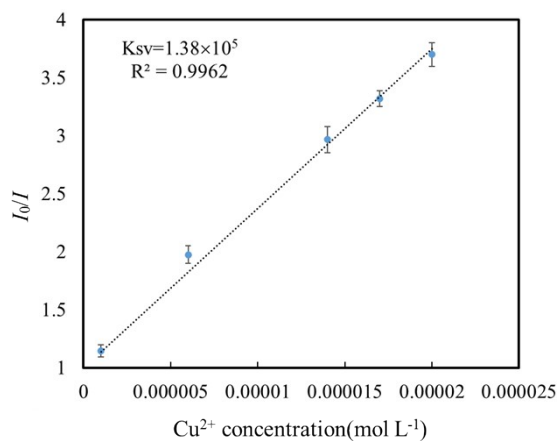

Fig. S8 The effects of pH values on  $\text{Cu}^{2+}$  detection. ( $\lambda_{\text{ex}}=350$  nm)

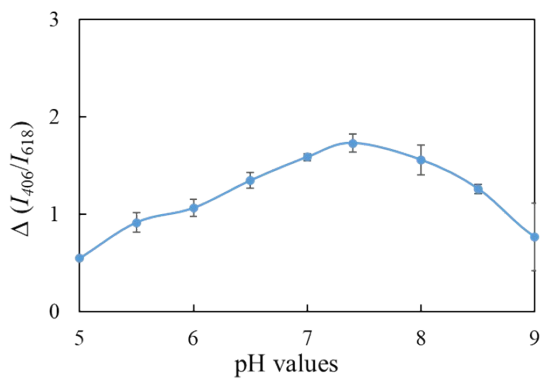

Fig. S9 The effects of reaction time on Cu<sup>2+</sup> detection. ( $\lambda_{ex}$ =350 nm, pH 7.4)

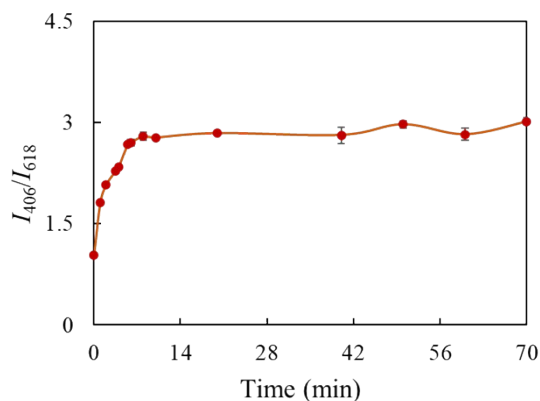

Fig. S10 Cytotoxicity of PAAC-Eu against the Hela cells.

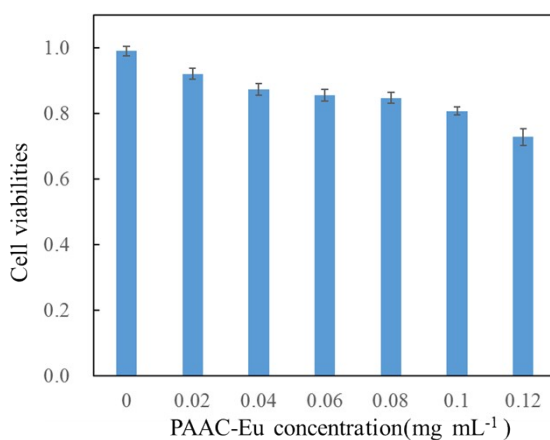

Fig. S11 XPS survey spectrum of PAAC-Eu-Cu (a), the high-resolution spectra for Cu(II) 2p for PAAC-Eu-Cu(b) and PAAC-Eu(c) and the high-resolution spectra for Eu(III) 3d(d), C1s (e) and O1s (f) of PAAC-Eu-Cu, respectively.

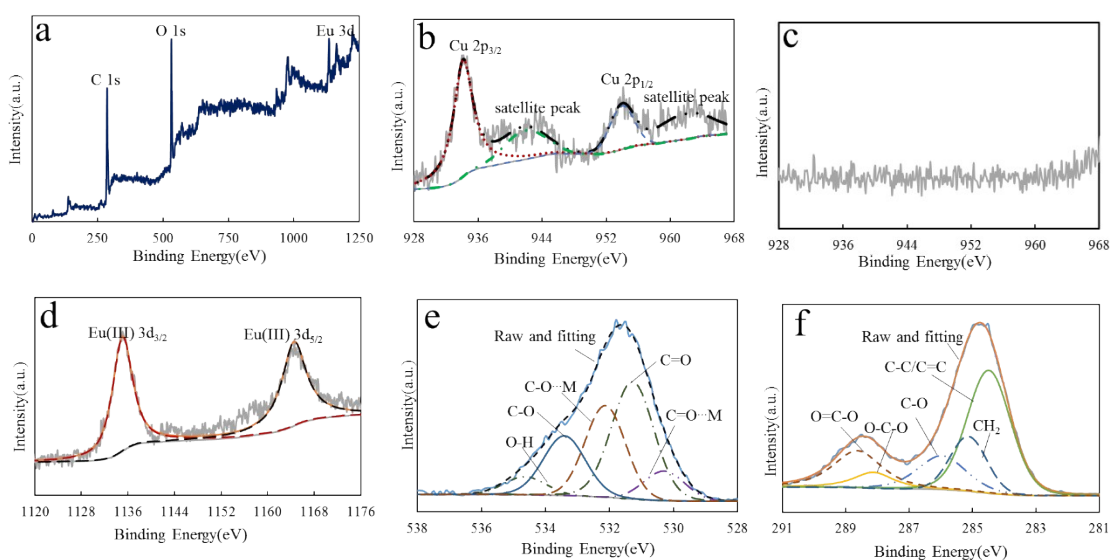

Fig. S12 UV-Vis absorbance spectra of PAAC-Eu solution containing the different amounts of  $\text{Cu}^{2+}$ .

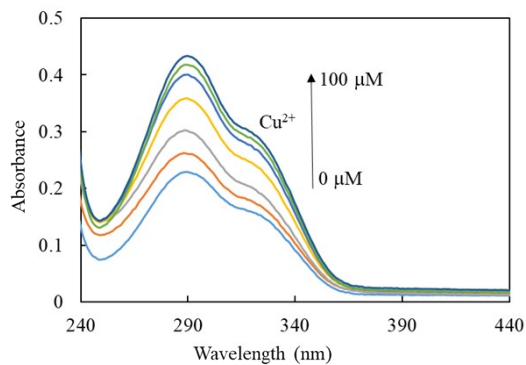

Fig. S13 FTIR spectra of PAAC-Eu(—) and PAAC-Eu-Cu (-----) by KBr method, respectively.

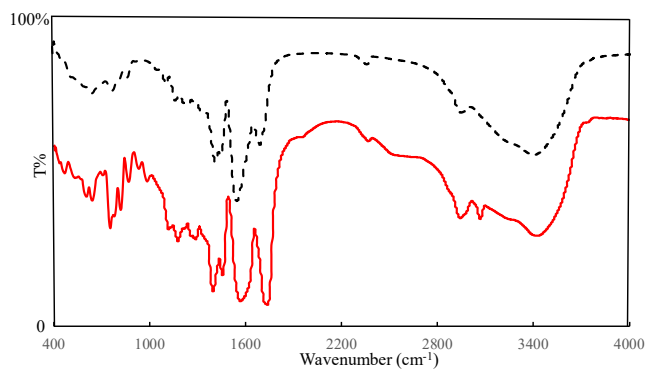

Fig. S14 The “on-off-on” phenomenon of PAAC-Eu fluorescence upon the alternate additions of  $\text{Cu}^{2+}$  and EDTA.

( $\lambda_{\text{ex}}=350 \text{ nm}$ )

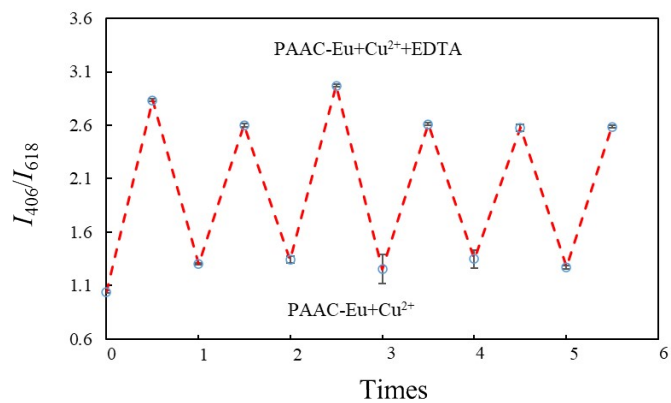

Table S1 Comparison of PAAC-Eu with several reported Eu-based fluorescence sensors for Cu<sup>2+</sup> detection

| Sensor                                                                                                               | Preparation                                                                                                                                                                                                                                                                                                                                   | Detection mode           | Detection media                                      | Linear range             | DL                      | Ref.      |
|----------------------------------------------------------------------------------------------------------------------|-----------------------------------------------------------------------------------------------------------------------------------------------------------------------------------------------------------------------------------------------------------------------------------------------------------------------------------------------|--------------------------|------------------------------------------------------|--------------------------|-------------------------|-----------|
| Eu <sup>3+</sup> -BHHCT-BPED                                                                                         | (1) Prepared 4,40-bis (100,100, 100,200,200,300,300-heptafluoro-400,600-hexanedione-600-yl)-chlorosulfo-terphenyl (BHHCT) dipicolylamine (DPA)-containing N,N-bis(2-pyridyl methyl)ethanediamine (BPED); (2) Synthesis of BHHCT–BPED at room temperature in dark for 5 days, and then coordination with europium(III) for 24 h.               | Fluorescence quenching   | Borate buffer (0.05 M, pH 7.4, 0.1% CTAB             | 0.01-0.1 μM              | 3.7 nM                  | 19        |
| [Eu <sub>2</sub> (MTBC)(OH) <sub>2</sub> (DMF) <sub>3</sub> (H <sub>2</sub> O) <sub>4</sub> ]-2DMF·7H <sub>2</sub> O | Solvothermal method in DMF at 100 °C for 12 h with Eu(CH <sub>3</sub> COO) <sub>3</sub> , and 4',4',4',4'-methanetetrayltetrakis-[1,1'-biphenyl]-4-carboxylic acid (H4MTBC) as precursors                                                                                                                                                     | Fluorescence quenching   | DMF:H <sub>2</sub> O (1:1, v/v)                      | 0-500 mg L <sup>-1</sup> | 17.2 μg L <sup>-1</sup> | 20        |
| CPMFs                                                                                                                | Hydrothermal method at 160 °C temperature for 8 hours using 3,5-dinitrosalicylic acid (DNSA), Eu <sup>3+</sup> as precursors                                                                                                                                                                                                                  | Fluorescence quenching   | CH <sub>3</sub> OH:H <sub>2</sub> O (3 : 1), pH 7.03 | 2-12 μM.                 | 1.42 μM                 | 21        |
| Eu <sup>3+</sup> @CAU-11                                                                                             | CAU-11 was synthesized at 150 °C for 12 h using AlCl <sub>3</sub> ·6H <sub>2</sub> O and 4, 4'-sulfonyldibenzoic acid as precursors, and then stirred with Eu <sup>3+</sup> for 24 h at room temperature                                                                                                                                      | Fluorescence ratiometric | DMF                                                  | 0.05-10 mM               | 6.2 μM                  | 22        |
| Eu-PUF-1.5                                                                                                           | One-step co-polycondensation reaction                                                                                                                                                                                                                                                                                                         | Fluorescence quenching   | Water                                                | -                        | 0.28 μM                 | 23        |
| Colloidal GdVO <sub>4</sub> :Eu <sup>3+</sup> @SiO <sub>2</sub> nanocrystals                                         | Colloidal GdVO <sub>4</sub> :Eu <sup>3+</sup> NCs was synthesized at 120 °C for 12 h using Gd(NO <sub>3</sub> ) <sub>3</sub> , Eu(NO <sub>3</sub> ) <sub>3</sub> , Na <sub>3</sub> VO <sub>4</sub> and PAA as precursors in ethylene glycol/water, and then encapsulated with a uniform layer of ultrathin silica through a sol-gel strategy. | Fluorescence quenching   | Water                                                | 1-20 μM                  | 80 nM                   | 24        |
| EuW10/TMAB Composite                                                                                                 | EuW10 and TMAB mixed solution was incubated for 1 day at 20.0 ±0.1 °C                                                                                                                                                                                                                                                                         | Fluorescence quenching   | Aqueous solution                                     | 0.2–1.0 μM               | 0.15 μM                 | 25        |
| FNP(SDC <sub>0.05</sub> SDS <sub>0.95</sub> -LEuH-DPA)                                                               | Cl-LEuH was synthesized by a hydrothermal method at 90 °C for 12 h; and then SDC/SDS-LEuH was prepared by the ion-exchange method; Then SDC <sub>0.05</sub> SDS <sub>0.95</sub> -LEuH was exfoliated into monolayer nanosheets, which was mixed with DPA.                                                                                     | Fluorescence ratiometric | water–formamide                                      | 100 -1000 μM             | 4.91 μM                 | 26        |
| PAAC-Eu                                                                                                              | One-pot coordination reaction of Eu <sup>3+</sup> with commercially available poly(acrylic acid) and coumarin-3-carboxylic acid at room temperature for 2h.                                                                                                                                                                                   | Fluorescence ratiometric | pH 7.4 of HEPES buffer solution                      | 0–20.0 μM                | 0.175 μM                | This work |
